# Supplementary material for: Type I Interferon response in olfactory bulb, the site of tick-borne flavivirus accumulation, is primarily regulated by IPS-1
Source: PubMed Central journal article supplement (PMC4730761; doi:10.1186/s12974-016-0487-9), 2016-01-27

**Figure S3.**

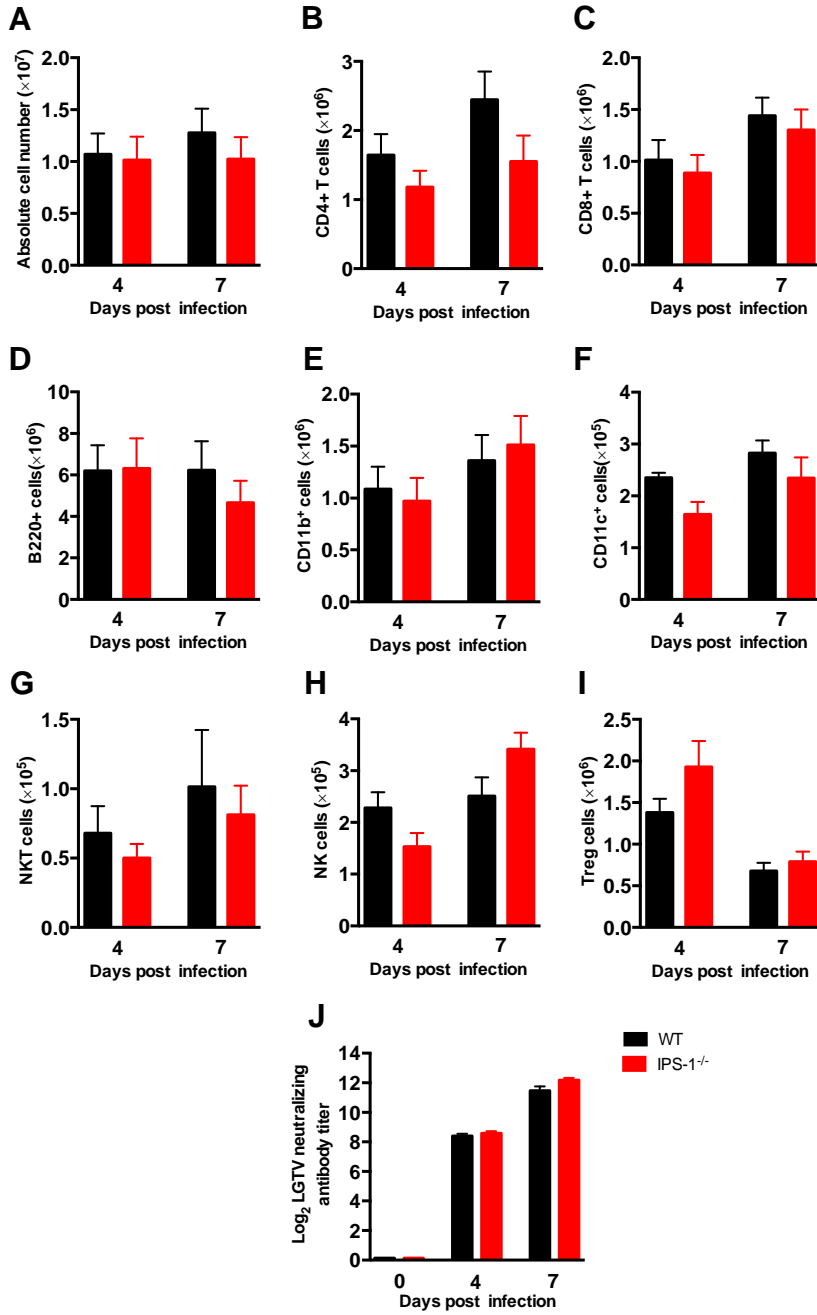

Supplement: 12974_2016_487_MOESM3_ESM.pdf [file 12974_2016_487_MOESM3_ESM.pdf]
