# Supplementary material for: Type I Interferon response in olfactory bulb, the site of tick-borne flavivirus accumulation, is primarily regulated by IPS-1
Source: Springer Nature journal article supplement (doi:10.1186/s12974-016-0487-9), 2016-01-27

## Additional file 1: Figure S1

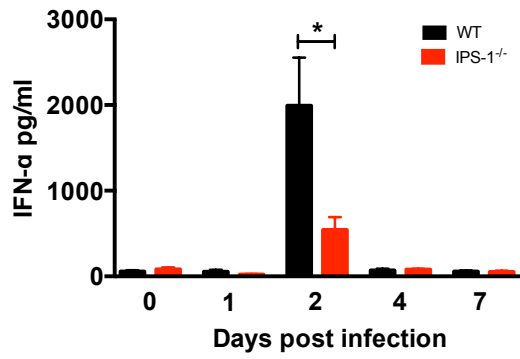

Supplement: MOESM1 [file 9769038]
