# Supplementary material for: Type I Interferon response in olfactory bulb, the site of tick-borne flavivirus accumulation, is primarily regulated by IPS-1
Source: Springer Nature journal article supplement (doi:10.1186/s12974-016-0487-9), 2016-01-27

Additional file 2: Figure S2

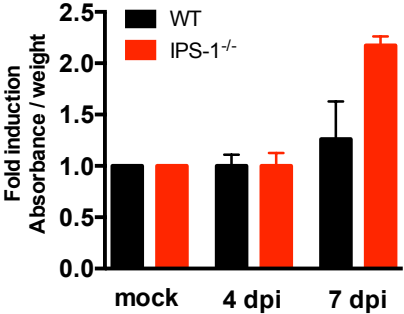

Supplement: MOESM2 [file 9769038]
